# Supplementary material
Source: MDPI journal article supplement (https://www.mdpi.com/2073-4441/14/17/2752)
Supplement: s1 [file s1]

## **Supplementary Information**

### **Digestate of Fecal Sludge Enhances the Tetracycline Removal in Soil Microbial Fuel Cells**

Cui Han, Jing Wang, Kun Feng, Defeng Xing\*

State Key Lab of Urban Water Resource and Environment, School of Environment,

Harbin Institute of Technology, Harbin 150090, China

**\*Corresponding author.** School of Environment, P.O. Box 2614, 73 Huanghe Road,

Nangang District, Harbin, Heilongjiang Province 150090, China

E-mail address: [dxing@hit.edu.cn](mailto:dxing@hit.edu.cn); Tel: +0086-451-86283123

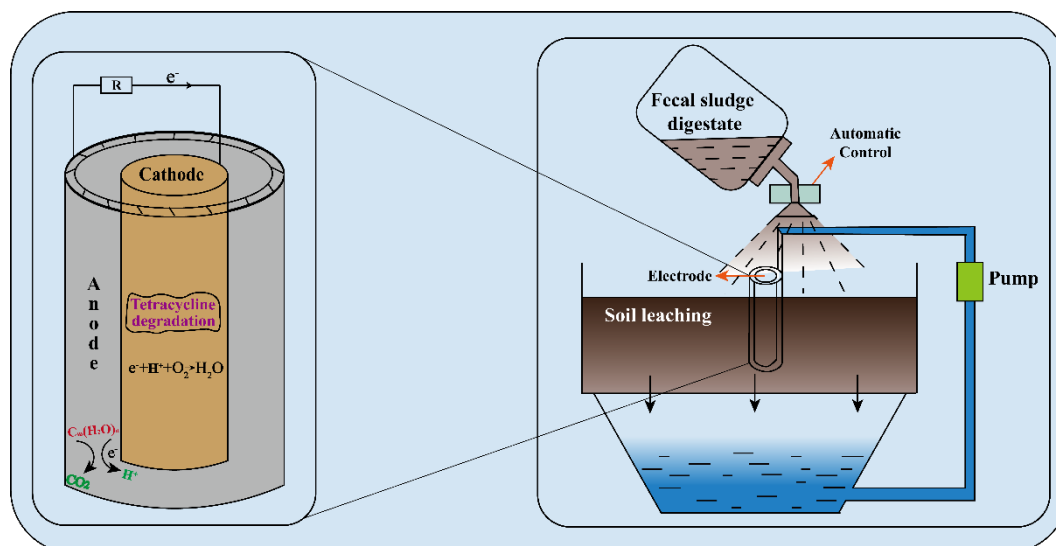

**Figure S1.** Sketch map of the soil leaching process in this experiment.

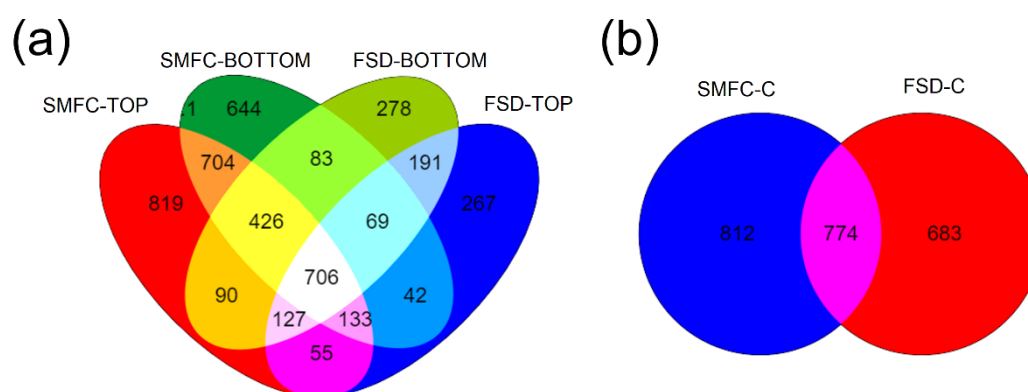

**Figure S2.** Venn diagram map based on the shared and unique OTUs of anode (a) and cathode (b) of the SMFC-FSD and SMFC.

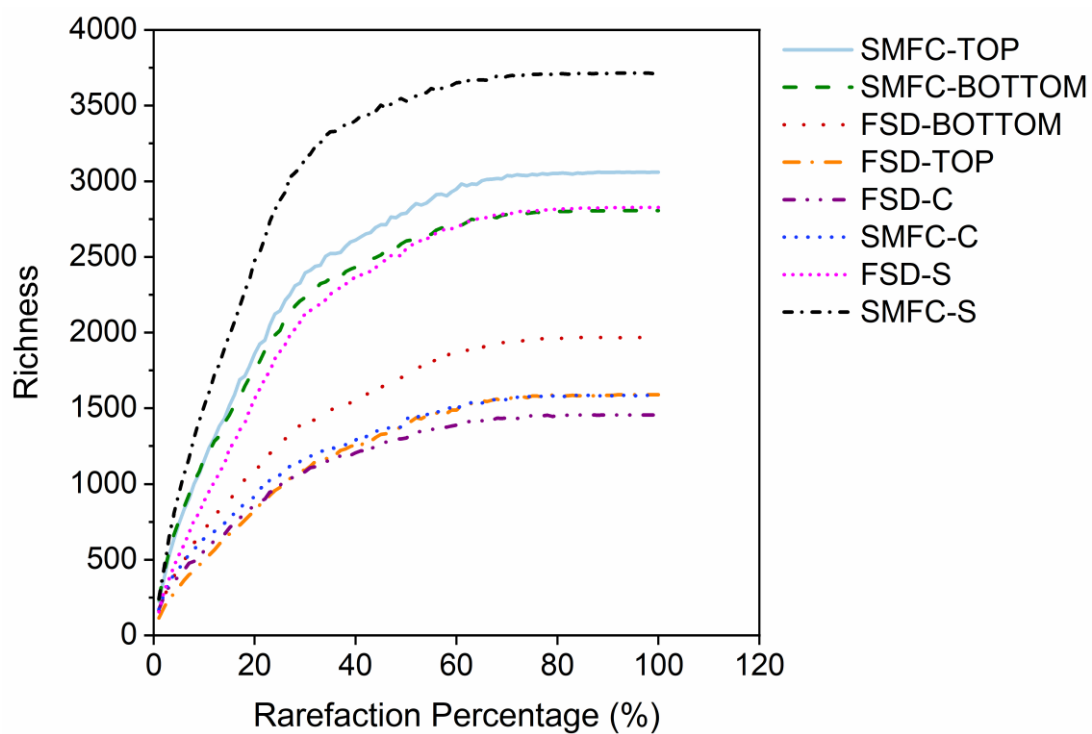

**Figure S3.** Rarefaction curves of all the samples in SMFC-FSD and SMFC reactors.

**Table S1.** Basic information of the simulated tetracycline-contaminated soil

| Parameter                            | Value      |
|--------------------------------------|------------|
| pH                                   | 7.7        |
| Moisture content                     | 83.15%     |
| Electrical conductivity              | 1325 mS/m  |
| Simulated tetracycline concentration | 0.13 mg/kg |
| C/N ratio                            | 11.79      |
| Cellulose content                    | 0.13 g/g   |

**Table S2.** Alpha diversity of microbial communities of anode, cathode, and soil samples based on 16S rRNA gene sequencing.

| <b>Sample</b>   | <b>Observed<br/>species</b> | <b>Shannon</b> | <b>Simpson</b> | <b>Chao1</b> |
|-----------------|-----------------------------|----------------|----------------|--------------|
| SMFC-TOP        | 3060                        | 5.71           | 0.02           | 3060.32      |
| SMFC-<br>BOTTOM | 2807                        | 6.29           | 0.0054         | 2807.24      |
| SMFC-C          | 1586                        | 4.94           | 0.023          | 1586.62      |
| SMFC-S          | 3714                        | 6.76           | 0.0038         | 3714.12      |
| FSD-TOP         | 1590                        | 3.38           | 0.23           | 1590.66      |
| FSD-BOTTOM      | 1970                        | 4.98           | 0.049          | 1970.82      |
| FSD-C           | 1457                        | 4.84           | 0.024          | 1586.63      |
| FSD-S           | 2827                        | 5.26           | 0.044          | 2827.31      |
